# Supplementary material for: Maltitol-based biodegradable polyesters with tailored degradation and controlled release for bone regeneration
Source: Royal Society of Chemistry journal article supplement (doi:10.1039/c6ra02058e), 2016-01-01
Supplement: c6ra02058e1.pdf [file c6ra02058e1.pdf]

**SUPPLEMENTARY INFORMATION**

**Maltitol Based Biodegradable Polyesters with Tailored Degradation  
and Controlled Release for Bone Regeneration**

Janeni Natarajan<sup>a</sup>, Giridhar Madras<sup>b</sup>, Kaushik Chatterjee<sup>c1</sup>

<sup>a</sup> *Centre for Nano Science and Engineering*

<sup>b</sup> *Department of Chemical Engineering*

<sup>c</sup> *Department of Materials Engineering*

*Indian Institute of Science*

*Bangalore-560012. INDIA*

---

<sup>1</sup>Corresponding author Tel: 91-80-22933408

Email address: [kchatterjee@materials.iisc.ernet.in](mailto:kchatterjee@materials.iisc.ernet.in)

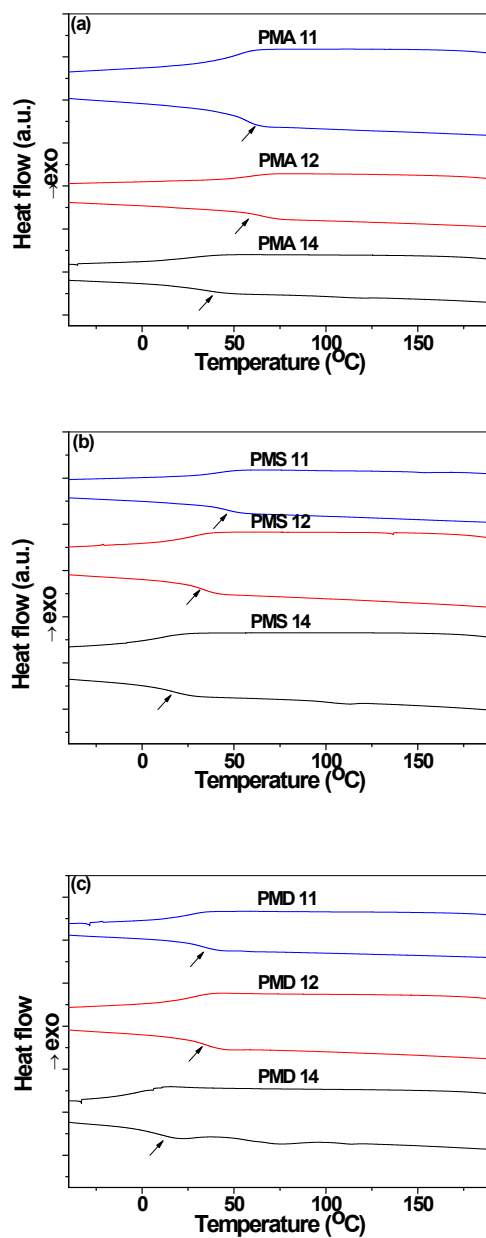

Figure S1. DSC curves of different polyesters (a) PMA (b) PMS (c) PMD showing the cooling and heating curves. The arrows indicate the transition indicating the glass transition temperature.
